# Supplementary material
Source: publisher figshare collection journal article supplement (https://sage.figshare.com/ndownloader/files/18005072)
Supplement: Supplementary file 1 [file 18005072]

## Data extraction form – used for all included papers

### Reference details

|                     |  |
|---------------------|--|
| First author        |  |
| Year of publication |  |
| Title of paper      |  |
| Reviewer's initials |  |
| Date of screening   |  |

### Study design

|                                                          |                             |  |
|----------------------------------------------------------|-----------------------------|--|
| Name of study/cohort (if applicable)                     |                             |  |
| Country                                                  |                             |  |
| Design                                                   | Experimental                |  |
|                                                          | Prospective observational   |  |
|                                                          | Retrospective observational |  |
|                                                          | Case-control                |  |
|                                                          | Cross-sectional             |  |
|                                                          | Other (specify)             |  |
| Year(s) data collection (if available)                   |                             |  |
| Sample size (N)                                          |                             |  |
| SMI cohort a sub-sample? Y/N<br>If no, N (%)             |                             |  |
| Whole sample deceased? Y/N<br>If no, N/% sample deceased |                             |  |
| Any relevant inclusion/exclusion criteria?               |                             |  |

### Sample characteristics

|                                                                          |                                                   |  |
|--------------------------------------------------------------------------|---------------------------------------------------|--|
| Age (mean or range)                                                      |                                                   |  |
| Gender                                                                   |                                                   |  |
| Type of population (if applicable) (eg, veterans)                        |                                                   |  |
| Setting (eg, community, hospital) (if applicable)                        |                                                   |  |
| SMI diagnosis                                                            | Mixed sample? Y/N<br>If yes, list diagnoses and % |  |
|                                                                          | Diagnosis specific? Y/N<br>If yes, specify        |  |
| Other comorbidities                                                      |                                                   |  |
| Did any of the SMI sample have physical diagnoses? Y/N<br>If yes, detail |                                                   |  |
| Cause of death (natural/unnatural/mixed, N/%)                            |                                                   |  |
| Cause of death (if deemed relevant)                                      |                                                   |  |
| Other comments                                                           |                                                   |  |

## Outcomes

### i. Place of death

(Leave blank if not relevant)

| Place of death       | N (%) | Comments | Comparator? (describe population and give N/%) |
|----------------------|-------|----------|------------------------------------------------|
| Care home            |       |          |                                                |
| Home                 |       |          |                                                |
| Hospice              |       |          |                                                |
| Hospital             |       |          |                                                |
| Other (give details) |       |          |                                                |

### ii. Health care in last year of life

| Type of health care | How is it measured?<br>Eg, Length of stay | Time frame | Comparator?<br>(If applicable) | Comments |
|---------------------|-------------------------------------------|------------|--------------------------------|----------|
|                     |                                           |            |                                |          |
|                     |                                           |            |                                |          |
|                     |                                           |            |                                |          |

Association(s) reported/description of health care access/use in the last year of life

|  |
|--|
|  |
|--|

## Quality assessment

|                                          |  |
|------------------------------------------|--|
| Quality assessment score (range 0.0-1.0) |  |
|------------------------------------------|--|
